# Supplementary material for: Cost implications of PSA screening differ by age
Source: Springer Nature journal article supplement (doi:10.1186/s12894-018-0344-5), 2018-05-09
Supplement: MOESM2 [file 15751186]

## Appendix

**Table 1 PSA**

| PSA test cost may include the following procedures (CPT code) |                                              |
|---------------------------------------------------------------|----------------------------------------------|
| 84152                                                         | ASSAY OF PROSTATE SPECIFIC ANTIGEN COMPLEXED |
| 84154                                                         | ASSAY OF PROSTATE SPECIFIC ANTIGEN FREE      |
| 84153                                                         | ASSAY OF PROSTATE SPECIFIC ANTIGEN TOTAL     |
| 36415                                                         | COLLECTION VENOUS BLOOD VENIPUNCTURE         |

**Table 2 Biopsy**

| Biopsy costs may include the following procedures (CPT code) |                                                                                  |
|--------------------------------------------------------------|----------------------------------------------------------------------------------|
| 55700                                                        | PROSTATE NEEDLE BIOPSY ANY APPROACH                                              |
| 76942                                                        | US GUIDANCE NEEDLE PLACEMENT RS&I LEVEL IV SURG PATHOLOGY GROSS&MICROSCOPIC EXAM |
| 88305                                                        | EXAM                                                                             |
| 76872                                                        | ULTRASOUND TRANSRECTAL                                                           |

**Table 3 Biopsy Complication**

| Criteria 1: Biopsy Complication (Diagnosis Code) | Criteria 2: Hospitalization and ED CPT                |
|--------------------------------------------------|-------------------------------------------------------|
| 599.7 HEMATURIA                                  | 99222 INITIAL HOSPITAL CARE/DAY 50 MINUTES            |
| 599.71 GROSS HEMATURIA                           | 99223 INITIAL HOSPITAL CARE/DAY 70 MINUTES            |
| 599.72 MICROSCOPIC HEMATURIA                     | 99231 SBSQ HOSPITAL CARE/DAY 15 MINUTES               |
| 608.82 HEMATOSPERMIA                             | 99233 SBSQ HOSPITAL CARE/DAY 35 MINUTES               |
| OTHER POSTOPERATIVE INFECTION                    | OBSERVATION/INPATIENT HOSPITAL CARE 55 MINUTES        |
| 998.59 NEC                                       | 99236 HOSPITAL DISCHARGE DAY MANAGEMENT 30 MIN/<      |
| 719.41 JOINT PAIN-SHOULD                         | 99238 HOSPITAL DISCHARGE DAY MANAGEMENT > 30 MIN      |
| 719.44 PAIN IN JOINT, HAND                       | 99239 EMERGENCY DEPARTMENT VISIT LIMITED/MINOR PROB   |
| 719.45 PAIN IN JOINT PELVIC REGION&THIGH         | 99281 EMERGENCY DEPARTMENT VISIT LOW/MODER SEVERITY   |
| 719.46 JOINT PAIN-LOW LE                         | 99282 EMERGENCY DEPARTMENT VISIT MODERATE SEVERITY    |
| 719.47 JOINT PAIN-ANKLE                          | 99283 EMERGENCY DEPARTMENT VISIT HIGH/URGENT SEVERITY |
| 719.49 PAIN IN JOINT, MULTIPLE SITES             | 99284 EMERGENCY DEPT VISIT HIGH SEVERITY&THREAT FUNCJ |
| 724.1 PAIN IN THORACIC SPINE                     |                                                       |
| 729.5 PAIN IN LIMB                               |                                                       |
| 786.5 CHEST PAIN NOS                             |                                                       |
| 786.59 OTHER CHEST PAIN                          |                                                       |
| 789 ABDOMINAL PAIN-SITE NOS                      |                                                       |
| ABDOMINAL PAIN RIGHT LOWER QUADRANT              |                                                       |
| 789.03 QUADRANT                                  |                                                       |
| 599 URINARY TRACT INF NOS                        |                                                       |

|                                 |                                              |
|---------------------------------|----------------------------------------------|
| 599.6 URINARY OBSTRUCTION NOS   | CRITICAL CARE ILL/INJURED PATIENT INIT 30-74 |
| 997.5 URINARY COMP NEC          | 99291 MIN                                    |
| 996.64 INFECT D/T URETHRAL CATH |                                              |
| 606.9 MALE INFERTILITY NOS      |                                              |

**Table 4 Radical Prostatectomy**

| Patients with the following CPT codes were identified as radical prostatectomy patients (CPT code) |       |
|----------------------------------------------------------------------------------------------------|-------|
| PROSTATECTOMY PERINEAL RADICAL                                                                     | 55810 |
| PROSTATECTOMY PERINEAL RADICAL W/LYMPH NODE BX                                                     | 55812 |
| PROSTATECTOMY PERINEAL RAD W/BI PELVIC LYMPH EXC                                                   | 55815 |
| PROSTATECTOMY SUPRAPUBIC SUBTOTAL 1/2 STAGES                                                       | 55821 |
| PROSTATECTOMY RETROPUBIC SUBTOTAL                                                                  | 55831 |
| PROSTATECTOMY RETROPUBIC W/WO NERVE SPARING                                                        | 55840 |
| PROSTECT RETROPUBIC RAD W/WO NRV SPAR W/LYMPH BX                                                   | 55842 |
| PROSTECT RETROPUB RAD W/WO NRV SPAR & BI PLV LYM                                                   | 55845 |
| LAPS PROSTECT RETROPUBIC RAD W/NRV SPARING ROBOT                                                   | 55866 |

**Table 5 Radical Prostatectomy Complication**

| Criteria 1: Post Surgery Complication ICD9 Diagnosis |       |                                                                                 |        |
|------------------------------------------------------|-------|---------------------------------------------------------------------------------|--------|
| Other                                                |       |                                                                                 |        |
| Medical                                              | 3530  | Brachial plexus lesions                                                         | 353    |
| Other                                                |       |                                                                                 |        |
| Medical                                              | 3542  | Lesion of ulnar nerve                                                           | 354.2  |
| Cardiac                                              | 40201 | Malignant hypertensive heart disease with heart failure                         | 402.01 |
| Cardiac                                              | 40211 | Benign hypertensive heart disease with heart failure                            | 402.11 |
| Cardiac                                              | 40291 | Unspecified hypertensive heart disease with heart failure                       | 402.91 |
| Cardiac                                              | 410   | Acute myocardial infarction                                                     | 410    |
| Cardiac                                              | 4100  | Acute myocardial infarction of anterolateral wall                               | 410    |
| Cardiac                                              | 41000 | Acute myocardial infarction of anterolateral wall, episode of care unspecified  | 410    |
| Cardiac                                              | 41001 | Acute myocardial infarction of anterolateral wall, initial episode of care      | 410.01 |
| Cardiac                                              | 41002 | Acute myocardial infarction of anterolateral wall, subsequent episode of care   | 410.02 |
| Cardiac                                              | 4101  | Acute myocardial infarction of other anterior wall                              | 410.1  |
| Cardiac                                              | 41010 | Acute myocardial infarction of other anterior wall, episode of care unspecified | 410.1  |
| Cardiac                                              | 41011 | Acute myocardial infarction of other anterior wall, initial episode of care     | 410.11 |
| Cardiac                                              | 41012 | Acute myocardial infarction of other anterior wall, subsequent episode of care  | 410.12 |
| Cardiac                                              | 4102  | Acute myocardial infarction of inferolateral wall                               | 410.2  |
| Cardiac                                              | 41020 | Acute myocardial infarction of inferolateral wall, episode of care unspecified  | 410.2  |
| Cardiac                                              | 41021 | Acute myocardial infarction of inferolateral wall, initial episode of care      | 410.21 |
| Cardiac                                              | 41022 | Acute myocardial infarction of inferolateral wall, subsequent episode of care   | 410.22 |
| Cardiac                                              | 4103  | Acute myocardial infarction of inferoposterior wall                             | 410.3  |

|         |       |                                                                                  |        |
|---------|-------|----------------------------------------------------------------------------------|--------|
|         |       | Acute myocardial infarction of inferoposterior wall, episode of care             |        |
| Cardiac | 41030 | unspecified                                                                      | 410.3  |
| Cardiac | 41031 | Acute myocardial infarction of inferoposterior wall, initial episode of care     | 410.31 |
|         |       | Acute myocardial infarction of inferoposterior wall, subsequent episode of care  |        |
| Cardiac | 41032 |                                                                                  | 410.32 |
| Cardiac | 4104  | Acute myocardial infarction of other inferior wall                               | 410.4  |
| Cardiac | 41040 | Acute myocardial infarction of other inferior wall, episode of care unspecified  | 410.4  |
| Cardiac | 41041 | Acute myocardial infarction of other inferior wall, initial episode of care      | 410.41 |
| Cardiac | 41042 | Acute myocardial infarction of other inferior wall, subsequent episode of care   | 410.42 |
| Cardiac | 4105  | Acute myocardial infarction of other lateral wall                                | 410.5  |
| Cardiac | 41050 | Acute myocardial infarction of other lateral wall, episode of care unspecified   | 410.5  |
| Cardiac | 41051 | Acute myocardial infarction of other lateral wall, initial episode of care       | 410.51 |
| Cardiac | 41052 | Acute myocardial infarction of other lateral wall, subsequent episode of care    | 410.52 |
| Cardiac | 4106  | Acute myocardial infarction, true posterior wall infarction                      | 410.6  |
| Cardiac | 41060 | True posterior wall infarction, episode of care unspecified                      | 410.6  |
| Cardiac | 41061 | True posterior wall infarction, initial episode of care                          | 410.61 |
| Cardiac | 41062 | True posterior wall infarction, subsequent episode of care                       | 410.62 |
| Cardiac | 4107  | Acute myocardial infarction, subendocardial infarction                           | 410.7  |
| Cardiac | 41070 | Subendocardial infarction, episode of care unspecified                           | 410.7  |
| Cardiac | 41071 | Subendocardial infarction, initial episode of care                               | 410.71 |
| Cardiac | 41072 | Subendocardial infarction, subsequent episode of care                            | 410.72 |
| Cardiac | 4108  | Acute myocardial infarction of other specified sites                             | 410.8  |
|         |       | Acute myocardial infarction of other specified sites, episode of care            |        |
| Cardiac | 41080 | unspecified                                                                      | 410.8  |
| Cardiac | 41081 | Acute myocardial infarction of other specified sites, initial episode of care    | 410.81 |
|         |       | Acute myocardial infarction of other specified sites, subsequent episode of care |        |
| Cardiac | 41082 |                                                                                  | 410.82 |
| Cardiac | 4109  | Acute myocardial infarction, unspecified site                                    | 410.9  |
| Cardiac | 41090 | Acute myocardial infarction of unspecified site, episode of care unspecified     | 410.9  |
| Cardiac | 41091 | Acute myocardial infarction of unspecified site, initial episode of care         | 410.91 |
| Cardiac | 41092 | Acute myocardial infarction of unspecified site, subsequent episode of care      | 410.92 |
| Cardiac | 4275  | Cardiac arrest                                                                   | 427.5  |
| Cardiac | 428   | Heart failure                                                                    | 428    |
| Cardiac | 4280  | Congestive heart failure, unspecified                                            | 428    |
| Cardiac | 4281  | Left heart failure                                                               | 428.1  |
| Cardiac | 42820 | Systolic heart failure, unspecified                                              | 428.2  |
| Cardiac | 42821 | Acute systolic heart failure                                                     | 428.21 |
| Cardiac | 42822 | Chronic systolic heart failure                                                   | 428.22 |
| Cardiac | 42823 | Acute on chronic systolic heart failure                                          | 428.23 |
| Cardiac | 42830 | Diastolic heart failure, unspecified                                             | 428.3  |
| Cardiac | 42831 | Acute diastolic heart failure                                                    | 428.31 |
| Cardiac | 42832 | Chronic diastolic heart failure                                                  | 428.32 |
| Cardiac | 42833 | Acute on chronic diastolic heart failure                                         | 428.33 |
| Cardiac | 42840 | Combined systolic and diastolic heart failure, unspecified                       | 428.4  |
| Cardiac | 42841 | Acute combined systolic and diastolic heart failure                              | 428.41 |
| Cardiac | 42842 | Chronic combined systolic and diastolic heart failure                            | 428.42 |
| Cardiac | 42843 | Acute on chronic combined systolic and diastolic heart failure                   | 428.43 |
| Cardiac | 4289  | Heart failure, unspecified                                                       | 428.9  |

|          |       |                                                                                                              |        |
|----------|-------|--------------------------------------------------------------------------------------------------------------|--------|
| Vascular | 433   | Occlusion and stenosis of precerebral arteries                                                               | 433    |
| Vascular | 4330  | Occlusion and stenosis of basilar artery                                                                     | 433    |
| Vascular | 43300 | Occlusion and stenosis of basilar artery without mention of cerebral infarction                              | 433    |
| Vascular | 43301 | Occlusion and stenosis of basilar artery with cerebral infarction                                            | 433.01 |
| Vascular | 4331  | Occlusion and stenosis of carotid artery                                                                     | 433.1  |
| Vascular | 43310 | Occlusion and stenosis of carotid artery without mention of cerebral infarction                              | 433.1  |
| Vascular | 43311 | Occlusion and stenosis of carotid artery with cerebral infarction                                            | 433.11 |
| Vascular | 4332  | Occlusion and stenosis of vertebral artery                                                                   | 433.2  |
| Vascular | 43320 | Occlusion and stenosis of vertebral artery without mention of cerebral infarction                            | 433.2  |
| Vascular | 43321 | Occlusion and stenosis of vertebral artery with cerebral infarction                                          | 433.21 |
| Vascular | 4333  | Occlusion and stenosis of multiple and bilateral precerebral arteries                                        | 433.3  |
| Vascular | 43330 | Occlusion and stenosis of multiple and bilateral precerebral arteries without mention of cerebral infarction | 433.3  |
| Vascular | 43331 | Occlusion and stenosis of multiple and bilateral precerebral arteries with cerebral infarction               | 433.31 |
| Vascular | 4338  | Occlusion and stenosis of other specified precerebral artery                                                 | 433.8  |
| Vascular | 43380 | Occlusion and stenosis of other specified precerebral artery without mention of cerebral infarction          | 433.8  |
| Vascular | 43381 | Occlusion and stenosis of other specified precerebral artery with cerebral infarction                        | 433.81 |
| Vascular | 4339  | Occlusion and stenosis of unspecified precerebral artery                                                     | 433.9  |
| Vascular | 43390 | Occlusion and stenosis of unspecified precerebral artery without mention of cerebral infarction              | 433.9  |
| Vascular | 43391 | Occlusion and stenosis of unspecified precerebral artery with cerebral infarction                            | 433.91 |
| Vascular | 434   | Occlusion of cerebral arteries                                                                               | 434    |
| Vascular | 4340  | Cerebral thrombosis                                                                                          | 434    |
| Vascular | 43400 | Cerebral thrombosis without mention of cerebral infarction                                                   | 434    |
| Vascular | 43401 | Cerebral thrombosis with cerebral infarction                                                                 | 434.01 |
| Vascular | 4341  | Cerebral embolism                                                                                            | 434.1  |
| Vascular | 43410 | Cerebral embolism without mention of cerebral infarction                                                     | 434.1  |
| Vascular | 43411 | Cerebral embolism with cerebral infarction                                                                   | 434.11 |
| Vascular | 4349  | Unspecified cerebral artery occlusion                                                                        | 434.9  |
| Vascular | 43490 | Cerebral artery occlusion, unspecified without mention of cerebral infarction                                | 434.9  |
| Vascular | 43491 | Cerebral artery occlusion, unspecified with cerebral infarction                                              | 434.91 |
| Vascular | 436   | Acute, but ill-defined, cerebrovascular disease                                                              | 436    |
| Vascular | 437   | Other and ill-defined cerebrovascular disease                                                                | 437    |
| Vascular | 4370  | Cerebral atherosclerosis                                                                                     | 437    |
| Vascular | 4371  | Other generalized ischemic cerebrovascular disease                                                           | 437.1  |
| Vascular | 4372  | Hypertensive encephalopathy                                                                                  | 437.2  |
| Vascular | 4373  | Cerebral aneurysm, nonruptured                                                                               | 437.3  |
| Vascular | 4374  | Cerebral arteritis                                                                                           | 437.4  |
| Vascular | 4375  | Moyamoya disease                                                                                             | 437.5  |
| Vascular | 4376  | Nonpyogenic thrombosis of intracranial venous sinus                                                          | 437.6  |
| Vascular | 4377  | Transient global amnesia                                                                                     | 437.7  |
| Vascular | 4378  | Other ill-defined cerebrovascular disease                                                                    | 437.8  |
| Vascular | 4379  | Unspecified cerebrovascular disease                                                                          | 437.9  |

|             |       |                                                                          |        |
|-------------|-------|--------------------------------------------------------------------------|--------|
| Vascular    | 44422 | Arterial embolism and thrombosis of lower extremity                      | 444.22 |
| Vascular    | 44481 | Embolism and thrombosis of iliac artery                                  | 444.81 |
| Vascular    | 4511  | Phlebitis and thrombophlebitis of deep veins of lower extremities        | 451.1  |
| Vascular    | 45111 | Phlebitis and thrombophlebitis of femoral vein (deep) (superficial)      | 451.11 |
| Vascular    | 45119 | Phlebitis and thrombophlebitis of deep veins of lower extremities, other | 451.19 |
| Vascular    | 4512  | Phlebitis and thrombophlebitis of lower extremities, unspecified         | 451.2  |
| Vascular    | 45181 | Phlebitis and thrombophlebitis of iliac vein                             | 451.81 |
| Vascular    | 4519  | Phlebitis and thrombophlebitis of unspecified site                       | 451.9  |
| Vascular    | 4538  | Embolism and thrombosis of other specified veins                         | 453.8  |
| Vascular    | 4539  | Other venous embolism and thrombosis of unspecified site                 | 453.9  |
| Other       |       |                                                                          |        |
| Medical     | 4578  | Other noninfectious disorders of lymphatic channels                      | 457.8  |
| Respiratory | 466   | Acute bronchitis and bronchiolitis                                       | 466    |
| Respiratory | 4660  | Acute bronchitis                                                         | 466    |
| Respiratory | 4661  | Acute bronchiolitis                                                      | 466.1  |
| Respiratory | 46611 | Acute bronchiolitis due to respiratory syncytial virus (RSV)             | 466.11 |
| Respiratory | 46619 | Acute bronchiolitis due to other infectious organisms                    | 466.19 |
| Respiratory | 480   | Viral pneumonia                                                          | 480    |
| Respiratory | 4800  | Pneumonia due to adenovirus                                              | 480    |
| Respiratory | 4801  | Pneumonia due to respiratory syncytial virus                             | 480.1  |
| Respiratory | 4802  | Pneumonia due to parainfluenza virus                                     | 480.2  |
| Respiratory | 4803  | Pneumonia due to SARS-associated coronavirus                             | 480.3  |
| Respiratory | 4808  | Pneumonia due to other virus not elsewhere classified                    | 480.8  |
| Respiratory | 4809  | Viral pneumonia, unspecified                                             | 480.9  |
| Respiratory | 481   | Pneumococcal pneumonia [ <i>Streptococcus pneumoniae pneumoniae</i> ]    | 481    |
| Respiratory | 482   | Other bacterial pneumonia                                                | 482    |
| Respiratory | 4820  | Pneumonia due to <i>Klebsiella pneumoniae</i>                            | 482    |
| Respiratory | 4821  | Pneumonia due to <i>Pseudomonas</i>                                      | 482.1  |
| Respiratory | 4822  | Pneumonia due to <i>Hemophilus influenzae</i> [ <i>H. influenzae</i> ]   | 482.2  |
| Respiratory | 4823  | Pneumonia due to <i>Streptococcus</i>                                    | 482.3  |
| Respiratory | 48230 | Pneumonia due to <i>Streptococcus</i> , unspecified                      | 482.3  |
| Respiratory | 48231 | Pneumonia due to <i>Streptococcus</i> , group A                          | 482.31 |
| Respiratory | 48232 | Pneumonia due to <i>Streptococcus</i> , group B                          | 482.32 |
| Respiratory | 48239 | Pneumonia due to other <i>Streptococcus</i>                              | 482.39 |
| Respiratory | 4824  | Pneumonia due to <i>Staphylococcus</i>                                   | 482.4  |
| Respiratory | 48240 | Pneumonia due to <i>Staphylococcus</i> , unspecified                     | 482.4  |
| Respiratory | 48241 | Methicillin susceptible pneumonia due to <i>Staphylococcus aureus</i>    | 482.41 |
| Respiratory | 48242 | Methicillin resistant pneumonia due to <i>Staphylococcus aureus</i>      | 482.42 |
| Respiratory | 48249 | Other <i>Staphylococcus pneumoniae</i>                                   | 482.49 |
| Respiratory | 4828  | Pneumonia due to other specified bacteria                                | 482.8  |
| Respiratory | 48281 | Pneumonia due to anaerobes                                               | 482.81 |
| Respiratory | 48282 | Pneumonia due to <i>Escherichia coli</i> [ <i>E. coli</i> ]              | 482.82 |
| Respiratory | 48283 | Pneumonia due to other gram-negative bacteria                            | 482.83 |
| Respiratory | 48284 | Pneumonia due to Legionnaires' disease                                   | 482.84 |
| Respiratory | 48289 | Pneumonia due to other specified bacteria                                | 482.89 |
| Respiratory | 4829  | Bacterial pneumonia, unspecified                                         | 482.9  |
| Respiratory | 483   | Pneumonia due to other specified organism                                | 483    |
| Respiratory | 4830  | Pneumonia due to <i>Mycoplasma pneumoniae</i>                            | 483    |

|             |       |                                                                           |        |
|-------------|-------|---------------------------------------------------------------------------|--------|
| Respiratory | 4831  | Pneumonia due to chlamydia                                                | 483.1  |
| Respiratory | 4838  | Pneumonia due to other specified organism                                 | 483.8  |
| Respiratory | 485   | Bronchopneumonia, organism unspecified                                    | 485    |
| Respiratory | 486   | Pneumonia, organism unspecified                                           | 486    |
| Respiratory | 514   | Pulmonary congestion and hypostasis                                       | 514    |
| Respiratory | 5180  | Pulmonary collapse                                                        | 518    |
| Respiratory | 5184  | Acute edema of lung, unspecified                                          | 518.4  |
| Respiratory | 5185  | Pulmonary insufficiency following trauma and surgery                      | 518.5  |
| Respiratory | 51881 | Acute respiratory failure                                                 | 518.81 |
| Respiratory | 51882 | Other pulmonary insufficiency, not elsewhere classified                   | 518.82 |
| Other       |       |                                                                           |        |
| Medical     | 531   | Gastric ulcer                                                             | 531    |
| Other       |       |                                                                           |        |
| Medical     | 5310  | Acute gastric ulcer with hemorrhage                                       | 531    |
| Other       |       |                                                                           |        |
| Medical     | 53100 | Acute gastric ulcer with hemorrhage, without mention of obstruction       | 531    |
| Other       |       |                                                                           |        |
| Medical     | 53101 | Acute gastric ulcer with hemorrhage, with obstruction                     | 531.01 |
| Other       |       |                                                                           |        |
| Medical     | 5311  | Acute gastric ulcer with perforation                                      | 531.1  |
| Other       |       |                                                                           |        |
| Medical     | 53110 | Acute gastric ulcer with perforation, without mention of obstruction      | 531.1  |
| Other       |       |                                                                           |        |
| Medical     | 53111 | Acute gastric ulcer with perforation, with obstruction                    | 531.11 |
| Other       |       |                                                                           |        |
| Medical     | 5312  | Acute gastric ulcer with hemorrhage and perforation                       | 531.2  |
| Other       |       | Acute gastric ulcer with hemorrhage and perforation, without mention of   |        |
| Medical     | 53120 | obstruction                                                               | 531.2  |
| Other       |       |                                                                           |        |
| Medical     | 53121 | Acute gastric ulcer with hemorrhage and perforation, with obstruction     | 531.21 |
| Other       |       |                                                                           |        |
| Medical     | 5313  | Acute gastric ulcer without mention of hemorrhage or perforation          | 531.3  |
| Other       |       | Acute gastric ulcer without mention of hemorrhage or perforation, without |        |
| Medical     | 53130 | mention of obstruction                                                    | 531.3  |
| Other       |       | Acute gastric ulcer without mention of hemorrhage or perforation, with    |        |
| Medical     | 53131 | obstruction                                                               | 531.31 |
| Other       |       |                                                                           |        |
| Medical     | 5314  | Chronic or unspecified gastric ulcer with hemorrhage                      | 531.4  |
| Other       |       | Chronic or unspecified gastric ulcer with hemorrhage, without mention of  |        |
| Medical     | 53140 | obstruction                                                               | 531.4  |
| Other       |       |                                                                           |        |
| Medical     | 53141 | Chronic or unspecified gastric ulcer with hemorrhage, with obstruction    | 531.41 |
| Other       |       |                                                                           |        |
| Medical     | 5315  | Chronic or unspecified gastric ulcer with perforation                     | 531.5  |
| Other       |       | Chronic or unspecified gastric ulcer with perforation, without mention of |        |
| Medical     | 53150 | obstruction                                                               | 531.5  |
| Other       |       |                                                                           |        |
| Medical     | 53151 | Chronic or unspecified gastric ulcer with perforation, with obstruction   | 531.51 |
| Other       |       |                                                                           |        |
| Medical     | 5316  | Chronic or unspecified gastric ulcer with hemorrhage and perforation      | 531.6  |
| Other       |       | Chronic or unspecified gastric ulcer with hemorrhage and perforation,     |        |
| Medical     | 53160 | without mention of obstruction                                            | 531.6  |

|                  |       |                                                                                                                              |        |
|------------------|-------|------------------------------------------------------------------------------------------------------------------------------|--------|
| Other<br>Medical | 53161 | Chronic or unspecified gastric ulcer with hemorrhage and perforation, with obstruction                                       | 531.61 |
| Other<br>Medical | 5317  | Chronic gastric ulcer without mention of hemorrhage or perforation                                                           | 531.7  |
| Other<br>Medical | 53170 | Chronic gastric ulcer without mention of hemorrhage or perforation, without mention of obstruction                           | 531.7  |
| Other<br>Medical | 53171 | Chronic gastric ulcer without mention of hemorrhage or perforation, with obstruction                                         | 531.71 |
| Other<br>Medical | 5319  | Gastric ulcer, unspecified as acute or chronic, without mention of hemorrhage or perforation                                 | 531.9  |
| Other<br>Medical | 53190 | Gastric ulcer, unspecified as acute or chronic, without mention of hemorrhage or perforation, without mention of obstruction | 531.9  |
| Other<br>Medical | 53191 | Gastric ulcer, unspecified as acute or chronic, without mention of hemorrhage or perforation, with obstruction               | 531.91 |
| Other<br>Medical | 532   | Duodenal ulcer                                                                                                               | 532    |
| Other<br>Medical | 5320  | Acute duodenal ulcer with hemorrhage                                                                                         | 532    |
| Other<br>Medical | 53200 | Acute duodenal ulcer with hemorrhage, without mention of obstruction                                                         | 532    |
| Other<br>Medical | 53201 | Acute duodenal ulcer with hemorrhage, with obstruction                                                                       | 532.01 |
| Other<br>Medical | 5321  | Acute duodenal ulcer with perforation                                                                                        | 532.1  |
| Other<br>Medical | 53210 | Acute duodenal ulcer with perforation, without mention of obstruction                                                        | 532.1  |
| Other<br>Medical | 53211 | Acute duodenal ulcer with perforation, with obstruction                                                                      | 532.11 |
| Other<br>Medical | 5322  | Acute duodenal ulcer with hemorrhage and perforation                                                                         | 532.2  |
| Other<br>Medical | 53220 | Acute duodenal ulcer with hemorrhage and perforation, without mention of obstruction                                         | 532.2  |
| Other<br>Medical | 53221 | Acute duodenal ulcer with hemorrhage and perforation, with obstruction                                                       | 532.21 |
| Other<br>Medical | 5323  | Acute duodenal ulcer without mention of hemorrhage or perforation                                                            | 532.3  |
| Other<br>Medical | 53230 | Acute duodenal ulcer without mention of hemorrhage or perforation, without mention of obstruction                            | 532.3  |
| Other<br>Medical | 53231 | Acute duodenal ulcer without mention of hemorrhage or perforation, with obstruction                                          | 532.31 |
| Other<br>Medical | 5324  | Chronic or unspecified duodenal ulcer with hemorrhage                                                                        | 532.4  |
| Other<br>Medical | 53240 | Chronic or unspecified duodenal ulcer with hemorrhage, without mention of obstruction                                        | 532.4  |
| Other<br>Medical | 53241 | Chronic or unspecified duodenal ulcer with hemorrhage, with obstruction                                                      | 532.41 |
| Other<br>Medical | 5325  | Chronic or unspecified duodenal ulcer with perforation                                                                       | 532.5  |
| Other<br>Medical | 53250 | Chronic or unspecified duodenal ulcer with perforation, without mention of obstruction                                       | 532.5  |
| Other<br>Medical | 53251 | Chronic or unspecified duodenal ulcer with perforation, with obstruction                                                     | 532.51 |

|         |       |                                                                               |        |
|---------|-------|-------------------------------------------------------------------------------|--------|
| Other   |       |                                                                               |        |
| Medical | 5326  | Chronic or unspecified duodenal ulcer with hemorrhage and perforation         | 532.6  |
| Other   |       | Chronic or unspecified duodenal ulcer with hemorrhage and perforation,        |        |
| Medical | 53260 | without mention of obstruction                                                | 532.6  |
| Other   |       | Chronic or unspecified duodenal ulcer with hemorrhage and perforation, with   |        |
| Medical | 53261 | obstruction                                                                   | 532.61 |
| Other   |       |                                                                               |        |
| Medical | 5327  | Chronic duodenal ulcer without mention of hemorrhage or perforation           | 532.7  |
| Other   |       | Chronic duodenal ulcer without mention of hemorrhage or perforation,          |        |
| Medical | 53270 | without mention of obstruction                                                | 532.7  |
| Other   |       | Chronic duodenal ulcer without mention of hemorrhage or perforation, with     |        |
| Medical | 53271 | obstruction                                                                   | 532.71 |
| Other   |       | Duodenal ulcer, unspecified as acute or chronic, without mention of           |        |
| Medical | 5329  | hemorrhage or perforation                                                     | 532.9  |
| Other   |       | Duodenal ulcer, unspecified as acute or chronic, without hemorrhage or        |        |
| Medical | 53290 | perforation, without mention of obstruction                                   | 532.9  |
| Other   |       | Duodenal ulcer, unspecified as acute or chronic, without mention of           |        |
| Medical | 53291 | hemorrhage or perforation, with obstruction                                   | 532.91 |
| Other   |       |                                                                               |        |
| Medical | 533   | Peptic ulcer, site unspecified                                                | 533    |
| Other   |       |                                                                               |        |
| Medical | 5330  | Acute peptic ulcer, unspecified site, with hemorrhage                         | 533    |
| Other   |       | Acute peptic ulcer of unspecified site with hemorrhage, without mention of    |        |
| Medical | 53300 | obstruction                                                                   | 533    |
| Other   |       |                                                                               |        |
| Medical | 53301 | Acute peptic ulcer of unspecified site with hemorrhage, with obstruction      | 533.01 |
| Other   |       |                                                                               |        |
| Medical | 5331  | Acute peptic ulcer, unspecified site, with perforation                        | 533.1  |
| Other   |       | Acute peptic ulcer of unspecified site with perforation, without mention of   |        |
| Medical | 53310 | obstruction                                                                   | 533.1  |
| Other   |       |                                                                               |        |
| Medical | 53311 | Acute peptic ulcer of unspecified site with perforation, with obstruction     | 533.11 |
| Other   |       |                                                                               |        |
| Medical | 5332  | Acute peptic ulcer, unspecified site, with hemorrhage and perforation         | 533.2  |
| Other   |       | Acute peptic ulcer of unspecified site with hemorrhage and perforation,       |        |
| Medical | 53320 | without mention of obstruction                                                | 533.2  |
| Other   |       | Acute peptic ulcer of unspecified site with hemorrhage and perforation, with  |        |
| Medical | 53321 | obstruction                                                                   | 533.21 |
| Other   |       | Acute peptic ulcer, unspecified site, without mention of hemorrhage and       |        |
| Medical | 5333  | perforation                                                                   | 533.3  |
| Other   |       | Acute peptic ulcer of unspecified site without mention of hemorrhage and      |        |
| Medical | 53330 | perforation, without mention of obstruction                                   | 533.3  |
| Other   |       | Acute peptic ulcer of unspecified site without mention of hemorrhage and      |        |
| Medical | 53331 | perforation, with obstruction                                                 | 533.31 |
| Other   |       |                                                                               |        |
| Medical | 5334  | Chronic or unspecified peptic ulcer, unspecified site, with hemorrhage        | 533.4  |
| Other   |       | Chronic or unspecified peptic ulcer of unspecified site with hemorrhage,      |        |
| Medical | 53340 | without mention of obstruction                                                | 533.4  |
| Other   |       | Chronic or unspecified peptic ulcer of unspecified site with hemorrhage, with |        |
| Medical | 53341 | obstruction                                                                   | 533.41 |
| Other   |       |                                                                               |        |
| Medical | 5335  | Chronic or unspecified peptic ulcer, unspecified site, with perforation       | 533.5  |



|                |       |                                                                                                                                                 |        |
|----------------|-------|-------------------------------------------------------------------------------------------------------------------------------------------------|--------|
| Other Medical  | 53350 | Chronic or unspecified peptic ulcer of unspecified site with perforation, without mention of obstruction                                        | 533.5  |
| Other Medical  | 53351 | Chronic or unspecified peptic ulcer of unspecified site with perforation, with obstruction                                                      | 533.51 |
| Other Medical  | 5336  | Chronic or unspecified peptic ulcer, unspecified site, with hemorrhage and perforation                                                          | 533.6  |
| Other Medical  | 53360 | Chronic or unspecified peptic ulcer of unspecified site with hemorrhage and perforation, without mention of obstruction                         | 533.6  |
| Other Medical  | 53361 | Chronic or unspecified peptic ulcer of unspecified site with hemorrhage and perforation, with obstruction                                       | 533.61 |
| Other Medical  | 5337  | Chronic peptic ulcer, unspecified site, without mention of hemorrhage or perforation                                                            | 533.7  |
| Other Medical  | 53370 | Chronic peptic ulcer of unspecified site without mention of hemorrhage or perforation, without mention of obstruction                           | 533.7  |
| Other Medical  | 53371 | Chronic peptic ulcer of unspecified site without mention of hemorrhage or perforation, with obstruction                                         | 533.71 |
| Other Medical  | 5339  | Peptic ulcer, unspecified site, unspecified as acute or chronic, without mention of hemorrhage or p                                             | 533.9  |
| Other Medical  | 53390 | Peptic ulcer of unspecified site, unspecified as acute or chronic, without mention of hemorrhage or perforation, without mention of obstruction | 533.9  |
| Other Medical  | 53391 | Peptic ulcer of unspecified site, unspecified as acute or chronic, without mention of hemorrhage or perforation, with obstruction               | 533.91 |
| Other Medical  | 5601  | Paralytic ileus                                                                                                                                 | 560.1  |
| Other Medical  | 5608  | Other specified intestinal obstruction                                                                                                          | 560.8  |
| Other Medical  | 56081 | Intestinal or peritoneal adhesions with obstruction (postoperative) (postinfection)                                                             | 560.81 |
| Other Medical  | 56089 | Other specified intestinal obstruction                                                                                                          | 560.89 |
| Other Medical  | 5609  | Unspecified intestinal obstruction                                                                                                              | 560.9  |
| Surgical Wound | 5651  | Anal fistula                                                                                                                                    | 565.1  |
| Wound          | 567   | Peritonitis and retroperitoneal infections                                                                                                      | 567    |
| Wound          | 5670  | Peritonitis in infectious diseases classified elsewhere                                                                                         | 567    |
| Wound          | 5671  | Pneumococcal peritonitis                                                                                                                        | 567.1  |
| Wound          | 5672  | Other suppurative peritonitis                                                                                                                   | 567.2  |
| Wound          | 56721 | Peritonitis (acute) generalized                                                                                                                 | 567.21 |
| Wound          | 56722 | Peritoneal abscess                                                                                                                              | 567.22 |
| Wound          | 56723 | Spontaneous bacterial peritonitis                                                                                                               | 567.23 |
| Wound          | 56729 | Other suppurative peritonitis                                                                                                                   | 567.29 |
| Wound          | 56731 | Psoas muscle abscess                                                                                                                            | 567.31 |
| Wound          | 56738 | Other retroperitoneal abscess                                                                                                                   | 567.38 |
| Wound          | 56739 | Other retroperitoneal infections                                                                                                                | 567.39 |
| Wound          | 5678  | Other specified peritonitis                                                                                                                     | 567.8  |
| Wound          | 56781 | Choleperitonitis                                                                                                                                | 567.81 |
| Wound          | 56782 | Sclerosing mesenteritis                                                                                                                         | 567.82 |
| Wound          | 56789 | Other specified peritonitis                                                                                                                     | 567.89 |
| Wound          | 5679  | Unspecified peritonitis                                                                                                                         | 567.9  |

|               |       |                                                                          |        |
|---------------|-------|--------------------------------------------------------------------------|--------|
| Other         |       |                                                                          |        |
| Surgical      | 5693  | Hemorrhage of rectum and anus                                            | 569.3  |
| Other         |       |                                                                          |        |
| Surgical      | 5694  | Other specified disorders of rectum and anus                             | 569.4  |
| Other         |       |                                                                          |        |
| Surgical      | 56941 | Ulcer of anus and rectum                                                 | 569.41 |
| Other         |       |                                                                          |        |
| Surgical      | 56942 | Anal or rectal pain                                                      | 569.42 |
| Other         |       |                                                                          |        |
| Surgical      | 56943 | Anal sphincter tear (healed) (old)                                       | 569.43 |
| Other         |       |                                                                          |        |
| Surgical      | 56944 | Dysplasia of anus                                                        | 569.44 |
| Other         |       |                                                                          |        |
| Surgical      | 56949 | Other specified disorders of rectum and anus                             | 569.49 |
| Other         |       |                                                                          |        |
| Surgical      | 56983 | Perforation of intestine                                                 | 569.83 |
| Other         |       |                                                                          |        |
| Medical       | 5738  | Other specified disorders of liver                                       | 573.8  |
| Other         |       |                                                                          |        |
| Medical       | 584   | Acute renal failure                                                      | 584    |
| Other         |       |                                                                          |        |
| Medical       | 5845  | Acute kidney failure with lesion of tubular necrosis                     | 584.5  |
| Other         |       |                                                                          |        |
| Medical       | 5846  | Acute kidney failure with lesion of renal cortical necrosis              | 584.6  |
| Other         |       |                                                                          |        |
| Medical       | 5847  | Acute kidney failure with lesion of renal medullary [papillary] necrosis | 584.7  |
| Other         |       |                                                                          |        |
| Medical       | 5848  | Acute kidney failure with other specified pathological lesion in kidney  | 584.8  |
| Other         |       |                                                                          |        |
| Medical       | 5849  | Acute kidney failure, unspecified                                        | 584.9  |
| Other         |       |                                                                          |        |
| Medical       | 586   | Renal failure, unspecified                                               | 586    |
| Genitourinary | 5901  | Acute pyelonephritis                                                     | 590.1  |
| Genitourinary | 59010 | Acute pyelonephritis without lesion of renal medullary necrosis          | 590.1  |
| Genitourinary | 59011 | Acute pyelonephritis with lesion of renal medullary necrosis             | 590.11 |
| Genitourinary | 5902  | Renal and perinephric abscess                                            | 590.2  |
| Genitourinary | 5908  | Other pyelonephritis or pyonephrosis, not specified as acute or chronic  | 590.8  |
| Genitourinary | 59080 | Pyelonephritis, unspecified                                              | 590.8  |
| Genitourinary | 59081 | Pyelitis or pyelonephritis in diseases classified elsewhere              | 590.81 |
| Genitourinary | 5909  | Infection of kidney, unspecified                                         | 590.9  |
| Genitourinary | 591   | Hydronephrosis                                                           | 591    |
| Genitourinary | 5933  | Stricture or kinking of ureter                                           | 593.3  |
| Genitourinary | 5934  | Other ureteric obstruction                                               | 593.4  |
| Other         |       |                                                                          |        |
| Medical       | 5934  | Other ureteric obstruction                                               | 593.4  |
| Genitourinary | 59381 | Vascular disorders of kidney                                             | 593.81 |
| Genitourinary | 59382 | Ureteral fistula                                                         | 593.82 |
| Genitourinary | 59589 | Other specified types of cystitis                                        | 595.89 |
|               | 596   | Bladder Neck Obstruction                                                 | 596    |
| Genitourinary | 5961  | Intestino-vesical fistula                                                | 596.1  |
| Genitourinary | 5962  | Vesical fistula, not elsewhere classified                                | 596.2  |

|               |       |                                                                      |        |
|---------------|-------|----------------------------------------------------------------------|--------|
| Genitourinary | 5966  | Rupture of bladder, nontraumatic                                     | 596.6  |
| Genitourinary | 5991  | Urethral fistula                                                     | 599.1  |
| Other         |       |                                                                      |        |
| Surgical      | 6040  | Orchitis, epididymitis, and epididymo-orchitis, with abscess         | 604    |
| Other         |       |                                                                      |        |
| Medical       | 7234  | Brachial neuritis or radiculitis NOS                                 | 723.4  |
| Other         |       |                                                                      |        |
| Medical       | 7824  | Jaundice, unspecified, not of newborn                                | 782.4  |
| Other         |       |                                                                      |        |
| Medical       | 7855  | Shock without mention of trauma                                      | 785.5  |
| Other         |       |                                                                      |        |
| Medical       | 78550 | Shock, unspecified                                                   | 785.5  |
| Other         |       |                                                                      |        |
| Medical       | 78551 | Cardiogenic shock                                                    | 785.51 |
| Other         |       |                                                                      |        |
| Medical       | 78552 | Septic shock                                                         | 785.52 |
| Other         |       |                                                                      |        |
| Medical       | 78559 | Other shock without mention of trauma                                | 785.59 |
| Respiratory   | 7991  | Respiratory arrest                                                   | 799.1  |
| Other         |       |                                                                      |        |
| Surgical      | 90250 | Injury to iliac vessel(s), unspecified                               | 902.5  |
| Other         |       |                                                                      |        |
| Surgical      | 90251 | Injury to hypogastric artery                                         | 902.51 |
| Other         |       |                                                                      |        |
| Surgical      | 90252 | Injury to hypogastric vein                                           | 902.52 |
| Other         |       |                                                                      |        |
| Medical       | 9551  | Injury to median nerve                                               | 955.1  |
| Other         |       |                                                                      |        |
| Medical       | 9553  | Injury to radial nerve                                               | 955.3  |
| Other         |       |                                                                      |        |
| Medical       | 9557  | Injury to other specified nerve(s) of shoulder girdle and upper limb | 955.7  |
| Other         |       |                                                                      |        |
| Medical       | 9558  | Injury to multiple nerves of shoulder girdle and upper limb          | 955.8  |
| Other         |       |                                                                      |        |
| Medical       | 9559  | Injury to unspecified nerve of shoulder girdle and upper limb        | 955.9  |
| Other         |       |                                                                      |        |
| Surgical      | 9560  | Injury to sciatic nerve                                              | 956    |
| Other         |       |                                                                      |        |
| Surgical      | 9561  | Injury to femoral nerve                                              | 956.1  |
| Other         |       |                                                                      |        |
| Surgical      | 9564  | Injury to cutaneous sensory nerve, lower limb                        | 956.4  |
| Other         |       |                                                                      |        |
| Surgical      | 9565  | Injury to other specified nerve(s) of pelvic girdle and lower limb   | 956.5  |
| Other         |       |                                                                      |        |
| Surgical      | 9568  | Injury to multiple nerves of pelvic girdle and lower limb            | 956.8  |
| Other         |       |                                                                      |        |
| Surgical      | 9569  | Injury to unspecified nerve of pelvic girdle and lower limb          | 956.9  |
|               | 9583  | Posttraum wnd infec NEC                                              | 958.3  |
| Other         |       |                                                                      |        |
| Medical       | 9954  | Shock due to anesthesia, not elsewhere classified                    | 995.4  |
|               | 99591 | Sepsis                                                               | 995.91 |
|               | 99631 | Malfunc urethral cath                                                | 996.31 |

|               |       |                                                                                |        |
|---------------|-------|--------------------------------------------------------------------------------|--------|
|               | 99639 | Malfunc gu dev/graft NEC                                                       | 996.39 |
|               | 99659 | Malfunc oth device/graft                                                       | 996.59 |
|               | 99664 | React-indwell urin cath                                                        | 996.64 |
|               | 99676 | Comp-genitourin dev/grft                                                       | 996.76 |
| Cardiac       | 9971  | Cardiac complications, not elsewhere classified                                | 997.1  |
| Vascular      | 9972  | Peripheral vascular complications, not elsewhere classified                    | 997.2  |
| Respiratory   | 9973  | Respiratory complications                                                      | 997.3  |
| Other         |       |                                                                                |        |
| Medical       | 9974  | Digestive system complications, not elsewhere classified                       | 997.4  |
|               | 99749 | Oth digestv system comp                                                        | 997.49 |
| Genitourinary | 9975  | Urinary complications, not elsewhere classified                                | 997.5  |
| Other         |       |                                                                                |        |
| Medical       | 9980  | Postoperative shock, not elsewhere classified                                  | 998    |
| Other         |       | Hemorrhage or hematoma or seroma complicating procedure, not elsewhere         |        |
| Surgical      | 9981  | classified                                                                     | 998.1  |
| Other         |       |                                                                                |        |
| Surgical      | 99811 | Hemorrhage complicating a procedure                                            | 998.11 |
| Other         |       |                                                                                |        |
| Surgical      | 99812 | Hematoma complicating a procedure                                              | 998.12 |
| Other         |       |                                                                                |        |
| Surgical      | 99813 | Seroma complicating a procedure                                                | 998.13 |
| Other         |       |                                                                                |        |
| Surgical      | 9982  | Accidental puncture or laceration during a procedure, not elsewhere classified | 998.2  |
| Wound         | 9983  | Disruption of operation wound                                                  | 998.3  |
|               | 99831 | Disrup internal op wound                                                       | 998.31 |
| Other         |       |                                                                                |        |
| Surgical      | 9984  | Foreign body accidentally left during a procedure                              | 998.4  |
| Wound         | 9985  | Postoperative infection, not elsewhere classified                              | 998.5  |
| Wound         | 99851 | Infected postoperative seroma                                                  | 998.51 |
| Wound         | 99859 | Other postoperative infection                                                  | 998.59 |
| Wound         | 9986  | Persistent postoperative fistula                                               | 998.6  |
| Other         |       |                                                                                |        |
| Medical       | 9987  | Acute reaction to foreign substance accidentally left during a procedure       | 998.7  |
| Other         |       |                                                                                |        |
| Surgical      | 99883 | Non-healing surgical wound                                                     | 998.83 |
|               | 99889 | Oth spcf cmplc procd NEC                                                       | 998.89 |
| Other         |       |                                                                                |        |
| Surgical      | 9989  | Unspecified complication of procedure, not elsewhere classified                | 998.9  |
| Vascular      | 9992  | Other vascular complications of medical care, not elsewhere classified         | 999.2  |
| Other         |       |                                                                                |        |
| Medical       | 9994  | Anaphylactic shock due to serum                                                | 999.4  |
| Other         |       |                                                                                |        |
| Medical       | 9995  | Other serum reaction, not elsewhere classified                                 | 999.5  |
| Other         |       |                                                                                |        |
| Medical       | 9996  | Abo incompatibility reaction, not elsewhere classified                         | 999.6  |
| Other         |       |                                                                                |        |
| Medical       | 9997  | Rh incompatibility reaction, not elsewhere classified                          | 999.7  |
| Other         |       |                                                                                |        |
| Medical       | 9998  | Other transfusion reaction, not elsewhere classified                           | 999.8  |
| Other         |       |                                                                                |        |
| Surgical      | E8700 | Accidental cut, puncture, perforation or hemorrhage during surgical operation  | E870.0 |

|          |       |                                                                              |        |
|----------|-------|------------------------------------------------------------------------------|--------|
| Other    |       | Accidental cut, puncture, perforation or hemorrhage during endoscopic        |        |
| Surgical | E8704 | examination                                                                  | E870.4 |
| Other    |       | Accidental cut, puncture, perforation or hemorrhage during administration of |        |
| Surgical | E8707 | enema                                                                        | E870.7 |
| Other    |       | Accidental cut, puncture, perforation or hemorrhage during other specified   |        |
| Surgical | E8708 | medical care                                                                 | E870.8 |
| Other    |       | Accidental cut, puncture, perforation or hemorrhage during unspecified       |        |
| Surgical | E8709 | medical care                                                                 | E870.9 |
| Other    |       |                                                                              |        |
| Surgical | E8710 | Foreign object left in body during surgical operation                        | E871.0 |
| Other    |       |                                                                              |        |
| Surgical | E8730 | Excessive amount of blood or other fluid during transfusion or infusion      | E873.0 |
| Other    |       |                                                                              |        |
| Surgical | E8760 | Mismatched blood in transfusion                                              | E876.0 |

Criteria 2: Post Surgery Complication Requiring Procedure (CPT)

- 50040 DRAINAGE OF KIDNEY
- 50120 EXPLORATION OF KIDNEY
- 50125 EXPLORE AND DRAIN KIDNEY
- 50395 CREATE PASSAGE TO KIDNEY
- 50398 CHANGE KIDNEY TUBE
- 50605 INSERT URETERAL SUPPORT
- 52290 CYSTOSCOPY AND TREATMENT
- 52332 CYSTOSCOPY AND TREATMENT
- 52334 CREATE PASSAGE TO KIDNEY
- 50600 EXPLORATION OF URETER
- 50700 REVISION OF URETER
- 50715 RELEASE OF URETER
- 50760 FUSION OF URETERS
- 50770 SPLICING OF URETERS
- 50780 REIMPLANT URETER IN BLADDER
- 50782 REIMPLANT URETER IN BLADDER
- 50783 REIMPLANT URETER IN BLADDER
- 50785 REIMPLANT URETER IN BLADDER
- 50800 IMPLANT URETER IN BOWEL
- 50810 FUSION OF URETER & BOWEL
- 50815 URINE SHUNT TO INTESTINE
- 50820 CONSTRUCT BOWEL BLADDER
- 50825 CONSTRUCT BOWEL BLADDER
- 50840 REPLACE URETER BY BOWEL
- 50900 REPAIR OF URETER
- 50940 RELEASE OF URETER

|       |                                                  |
|-------|--------------------------------------------------|
| 26990 | DRAINAGE OF PELVIS LESION<br>DRAINAGE OF RECTAL  |
| 45020 | ABSCESS                                          |
| 49060 | DRAIN OPEN RETROP ABSCESS<br>DRAINAGE OF BLADDER |
| 51080 | ABSCESS                                          |
| 52000 | Cystourethoroscropy                              |

**Table 6 Radiation Therapy**

Only patients with more than five radiation oncology treatments are included to calculate the average cost of treatment to the insurer.

| Criteria for Radiation Oncology Procedures (CPT Code) |                                                  |
|-------------------------------------------------------|--------------------------------------------------|
| 76873                                                 | US TRANSRCT PRSTATE VOL BRACHYTX PLNNING SPX     |
| 77263                                                 | THERAPEUTIC RADIOLOGY TX PLANNING COMPLEX        |
| 77470                                                 | SPECIAL TREATMENT PROCEDURE                      |
| 77370                                                 | SPEC MEDICAL RADJ PHYSICS CONSLTJ                |
| 77336                                                 | CONTINUING MEDICAL PHYSICS CONSLTJ PR WK         |
| 77290                                                 | THER RAD SIMULAJ-AIDED FIELD SETTING COMPLEX     |
| 77280                                                 | THER RAD SIMULAJ-AIDED FIELD SETTING SIMPLE      |
| 77300                                                 | BASIC RADIATION DOSIMETRY CALCULATION            |
| C1717                                                 | Brachytx, non-strm HDR Ir                        |
| 77790                                                 | SUPERVISION HANDLING LOADING RADIATION SOURCE    |
| 77732                                                 | Treatment Device                                 |
| 77301                                                 | NTSTY MODUL RADTHX PLN DOSE-VOL HISTOS           |
| 77334                                                 | TX DEVICES DESIGN & CONSTRUCTION COMPLEX         |
| 77338                                                 | MLC IMRT DESIGN & CONSTRUCTION PER IMRT PLAN     |
| 77418                                                 | NTSTY MODUL DLVR 1/MLT FLDS/ARCS PR TX SESSION   |
| 77014                                                 | CT GUIDANCE RADIATION THERAPY FLDS PLACEMENT     |
| 77427                                                 | RADIATION TREATMENT MANAGEMENT 5 TREATMENTS      |
| 77295                                                 | THER RAD SIMULAJ-AIDED FLD SETTING 3-DIMENSIONAL |
| 77331                                                 | SPEC DOSIM ONLY PRESCRIBED TREATING PHYS         |
| 77417                                                 | THERAPEUTIC RADIOLOGY PORT FILMS                 |
| 77326                                                 | BRACHYTHERAPY ISODOSE PLAN SIMPLE                |
| 77327                                                 | BRACHYTHERAPY ISODOSE PLAN INTERMEDIATE          |
| 77328                                                 | BRACHYTHERAPY ISODOSE PLAN COMPLEX               |
| 77785                                                 | REMOTE AFTLD RADIONUCLIDE BRACHYTX 1 CHANNEL     |
| 77786                                                 | REMOTE AFTLD RADIONUCLIDE BRACHYTX 2-12 CHANNEL  |
| 77787                                                 | REMOTE AFTLD RADIONUCLIDE BRACHYTX > 12 CHANNEL  |
| 77403                                                 | RADJ DLVR 1 AREA 1/PRLL OPSD PORTS SMPL 6-10MEV  |
| 77404                                                 | RADJ DLVR 1 AREA 1/PRLL OPSD PORTS SMPL 11-19MEV |
| 77405                                                 | DAI MEGAVOLTAGE RX MGMT; INTERME                 |
| 77406                                                 | RADJ DLVR 1 AREA 1/PRLL OPSD PORTS SMPL 20MEV/<  |
| 77407                                                 | RADJ DLVR 2 AREAS 3/>PORTS 1 MLT BLKS <5MEV      |
| 77408                                                 | RADJ DLVR 2 AREAS 3/>PORTS 1 MLT BLKS 6-1MEV     |
| 77409                                                 | RADJ DLVR 2 AREAS 3/>PORTS 1 MLT BLKS 11-19MEV   |
| 77410                                                 | DAI MEGAVOLTAGE RX MGMT; COMPLEX                 |

|                                                                                         |                                                |
|-----------------------------------------------------------------------------------------|------------------------------------------------|
| 77411                                                                                   | RADJ DLVR 2 AREAS 3/> PORTS 1 TX AREA 20 MEV/< |
| 77412                                                                                   | RADJ DLVR 3/> AREAS CUSTOM BLKING <5MEV        |
| 77413                                                                                   | RADJ DLVR 3/> AREAS CUSTOM BLKING 6-10MEV      |
| 77414                                                                                   | RADJ DLVR 3/> AREAS CUSTOM BLKING 11-19MEV     |
| 77415                                                                                   | THER RAD RX PORT FILM INTERPRET                |
| 77416                                                                                   | RADJ DLVR 3/> AREAS CUSTOM BLKING 20MEV/<      |
| And: 77421 Or "76950" Or "76370" Or "77522" Or "77332" Or "77778" Or "76965" Or "55875" |                                                |

**Table 7 Radiation Therapy Complications**

- 1) Extrapolated from the EHP database all diagnosis codes for Prostate Cancer Rad Onc patients
- 2) Selected diagnosis codes for common Rad Onc complications that usually occur within 30 days of treatment.

| Criteria for common diagnosis codes for common radiation oncology complications present in our patient sample |                      |
|---------------------------------------------------------------------------------------------------------------|----------------------|
| 599.71                                                                                                        | GROSS HEMATURIA      |
| 788.1                                                                                                         | DYSURIA<br>HEMATURIA |
| 599.7                                                                                                         | UNSPECIFIED          |
