# Supplementary material for: Cost implications of PSA screening differ by age
Source: Springer Nature journal article supplement (doi:10.1186/s12894-018-0344-5), 2018-05-09
Supplement: MOESM3 [file 15751186]

## Appendix:

### Source data for node transitions:

Node 1: PSA screening practice data from the Johns Hopkins Community Physicians group from April 1<sup>st</sup> 2013 to March 31<sup>st</sup>, 2014.

Node 2: PSA data obtained on a nationally representative sample of American men 40 years of age and older with no history of prostate cancer and no current inflammation or infection of the prostate gland (n = 1308) from the 2001-2002 National Health and Nutrition Examination Survey.<sup>11</sup>

Node 3: 38,350 men that were randomly assigned to the screening arm of the PLCO trial from November 1993 to June 2001.<sup>12</sup>

Node 4: 38,350 men that were randomly assigned to the screening arm of the PLCO trial from November 1993 to June 2001.<sup>12</sup>

Node 5: 13,805 men enrolled in the Cancer of the Prostate Strategic Urologic Research Endeavor, a national disease registry of men with biopsy proven prostate adenocarcinoma.<sup>13</sup>

Node 6: 13,805 men enrolled in the Cancer of the Prostate Strategic Urologic Research Endeavor, a national disease registry of men with biopsy proven prostate adenocarcinoma.
